# Supplementary material for: Determination of Wax Deposition Rate Model of Blended Oils with Different Blending Ratios
Source: MDPI journal article supplement (doi:10.3390/pr12040772), 2024-04-11
Supplement: s1 [file s1]

**Supporting information:****Table S1.** Wax deposition characteristics of oil sample 2

| Oil temperature<br>/°C | Wall temperature<br>/°C | Rotation speed<br>/(r·min <sup>-1</sup> ) | Wall Shear stress<br>/Pa | Oil viscosity<br>/Pa·s | Wax Crystal Solubility Coefficient<br>×10 <sup>-4</sup> /°C | Temperature gradient<br>/°C·m <sup>-1</sup> | Wax deposition rate<br>/g·m <sup>-2</sup> ·h <sup>-1</sup> |
|------------------------|-------------------------|-------------------------------------------|--------------------------|------------------------|-------------------------------------------------------------|---------------------------------------------|------------------------------------------------------------|
| 40                     | 30                      | 150                                       | 2.827                    | 0.165                  | 13.61                                                       | 573.7                                       | 5.28                                                       |
| 44                     | 34                      | 150                                       | 2.051                    | 0.123                  | 3.65                                                        | 574.4                                       | 2.88                                                       |
| 50                     | 40                      | 150                                       | 1.471                    | 0.051                  | 4.60                                                        | 572.4                                       | 8.26                                                       |
| 52                     | 42                      | 150                                       | 1.332                    | 0.046                  | 4.92                                                        | 571.9                                       | 8.88                                                       |
| 35                     | 30                      | 150                                       | 4.259                    | 0.157                  | 13.61                                                       | 287.8                                       | 3.35                                                       |
| 45                     | 30                      | 150                                       | 2.293                    | 0.169                  | 13.61                                                       | 860.1                                       | 6.88                                                       |
| 50                     | 30                      | 150                                       | 1.914                    | 0.172                  | 13.61                                                       | 1143.3                                      | 8.58                                                       |
| 47                     | 42                      | 150                                       | 1.524                    | 0.046                  | 4.92                                                        | 286.7                                       | 7.03                                                       |
| 57                     | 42                      | 150                                       | 1.162                    | 0.046                  | 4.92                                                        | 856.4                                       | 13.55                                                      |
| 62                     | 42                      | 150                                       | 1.030                    | 0.046                  | 4.92                                                        | 1140.3                                      | 15.76                                                      |
| 52                     | 42                      | 50                                        | 0.444                    | 0.046                  | 4.92                                                        | 571.9                                       | 20.51                                                      |
| 52                     | 42                      | 100                                       | 0.888                    | 0.046                  | 4.92                                                        | 571.9                                       | 13.89                                                      |
| 40                     | 30                      | 50                                        | 0.965                    | 0.191                  | 13.61                                                       | 573.7                                       | 8.77                                                       |
| 40                     | 30                      | 100                                       | 1.902                    | 0.174                  | 13.61                                                       | 573.7                                       | 6.05                                                       |

**Table S2.** Wax deposition characteristics of oil sample 3

| Oil temperature<br>/°C | Wall temperature<br>/°C | Rotation speed<br>/(r·min <sup>-1</sup> ) | Wall Shear stress<br>/Pa | Oil viscosity<br>/Pa·s | Wax Crystal Solubility Coefficient<br>×10 <sup>-4</sup> /°C | Temperature gradient<br>/°C·m <sup>-1</sup> | Wax deposition rate<br>/g·m <sup>-2</sup> ·h <sup>-1</sup> |
|------------------------|-------------------------|-------------------------------------------|--------------------------|------------------------|-------------------------------------------------------------|---------------------------------------------|------------------------------------------------------------|
| 37                     | 27                      | 150                                       | 1.964                    | 0.112                  | 24.06                                                       | 597.8                                       | 10.69                                                      |
| 40                     | 30                      | 150                                       | 1.617                    | 0.062                  | 13.58                                                       | 596.1                                       | 15.16                                                      |
| 43                     | 33                      | 150                                       | 1.377                    | 0.047                  | 4.37                                                        | 595.8                                       | 6.58                                                       |
| 46                     | 36                      | 150                                       | 1.197                    | 0.041                  | 2.40                                                        | 593.4                                       | 4.25                                                       |
| 49                     | 39                      | 150                                       | 1.041                    | 0.036                  | 3.40                                                        | 591.2                                       | 7.26                                                       |
| 51                     | 41                      | 150                                       | 0.948                    | 0.032                  | 4.30                                                        | 590.3                                       | 11.99                                                      |

|    |    |     |       |       |       |         |       |
|----|----|-----|-------|-------|-------|---------|-------|
| 53 | 43 | 150 | 0.863 | 0.030 | 2.98  | 589.9   | 9.01  |
| 32 | 27 | 150 | 2.477 | 0.110 | 24.06 | 302.7   | 8.54  |
| 42 | 27 | 150 | 1.660 | 0.113 | 24.06 | 894.07  | 15.52 |
| 47 | 27 | 150 | 1.420 | 0.114 | 24.06 | 1185.97 | 18.83 |
| 46 | 41 | 150 | 1.078 | 0.032 | 4.35  | 296.1   | 8.57  |
| 56 | 41 | 150 | 0.834 | 0.032 | 4.35  | 883.4   | 15.26 |
| 61 | 41 | 150 | 0.750 | 0.032 | 4.35  | 1175.3  | 19.12 |
| 51 | 41 | 50  | 0.316 | 0.032 | 4.35  | 590.3   | 22.11 |
| 51 | 41 | 100 | 0.632 | 0.032 | 4.35  | 590.3   | 15.77 |
| 37 | 27 | 50  | 0.660 | 0.123 | 24.06 | 597.8   | 20.85 |
| 37 | 27 | 100 | 1.313 | 0.116 | 24.06 | 597.8   | 15.02 |

**Table S3.** Wax deposition characteristics of oil sample 4

| Oil temperature<br>/°C | Wall temperature<br>/°C | Rotation speed<br>/(r·min <sup>-1</sup> ) | Wall Shear stress<br>/Pa | Oil viscosity<br>/Pa·s | Wax Crystal Solubility Coefficient<br>×10 <sup>-4</sup> /°C | Temperature gradient<br>/°C·m <sup>-1</sup> | Wax deposition rate<br>/g·m <sup>-2</sup> ·h <sup>-1</sup> |
|------------------------|-------------------------|-------------------------------------------|--------------------------|------------------------|-------------------------------------------------------------|---------------------------------------------|------------------------------------------------------------|
| 27                     | 17                      | 150                                       | 3.602                    | 0.262                  | 25.50                                                       | 587.3                                       | 1.86                                                       |
| 32                     | 22                      | 150                                       | 1.932                    | 0.110                  | 23.88                                                       | 574.3                                       | 6.86                                                       |
| 37                     | 27                      | 150                                       | 1.361                    | 0.052                  | 13.13                                                       | 567.9                                       | 10.25                                                      |
| 40                     | 30                      | 150                                       | 1.185                    | 0.040                  | 4.88                                                        | 567.7                                       | 6.89                                                       |
| 43                     | 33                      | 150                                       | 1.035                    | 0.035                  | 3.17                                                        | 566.8                                       | 4.24                                                       |
| 47                     | 37                      | 150                                       | 0.865                    | 0.029                  | 3.98                                                        | 565.1                                       | 5.82                                                       |
| 50                     | 40                      | 150                                       | 0.756                    | 0.025                  | 2.12                                                        | 564.7                                       | 5.14                                                       |
| 22                     | 17                      | 150                                       | 6.014                    | 0.221                  | 25.48                                                       | 295.9                                       | 1.21                                                       |
| 32                     | 17                      | 150                                       | 2.516                    | 0.294                  | 25.48                                                       | 866.5                                       | 2.68                                                       |
| 37                     | 17                      | 150                                       | 2.003                    | 0.316                  | 25.48                                                       | 1143.1                                      | 3.08                                                       |
| 35                     | 30                      | 150                                       | 1.337                    | 0.040                  | 4.88                                                        | 284.1                                       | 4.01                                                       |
| 45                     | 30                      | 150                                       | 1.046                    | 0.040                  | 4.88                                                        | 848.6                                       | 7.85                                                       |
| 50                     | 30                      | 150                                       | 0.920                    | 0.040                  | 4.88                                                        | 1128.1                                      | 8.51                                                       |
| 40                     | 30                      | 50                                        | 0.395                    | 0.040                  | 4.88                                                        | 567.7                                       | 11.39                                                      |
| 40                     | 30                      | 100                                       | 0.790                    | 0.040                  | 4.88                                                        | 567.7                                       | 7.09                                                       |

|    |    |     |       |       |       |       |      |
|----|----|-----|-------|-------|-------|-------|------|
| 27 | 17 | 50  | 1.301 | 0.368 | 25.48 | 587.3 | 3.06 |
| 27 | 17 | 100 | 2.476 | 0.297 | 25.48 | 587.3 | 2.51 |

**Table S4.** Wax deposition characteristics of oil sample 5

| Oil temperature<br>/°C | Wall temperature<br>/°C | Rotation speed<br>(r·min <sup>-1</sup> ) | Wall Shear stress<br>/Pa | Oil viscosity<br>/Pa·s | Wax Crystal Solubility Coefficient<br>×10 <sup>-4</sup> /°C | Temperature gradient<br>/°C·m <sup>-1</sup> | Wax deposition rate<br>/g·m <sup>-2</sup> ·h <sup>-1</sup> |
|------------------------|-------------------------|------------------------------------------|--------------------------|------------------------|-------------------------------------------------------------|---------------------------------------------|------------------------------------------------------------|
| 28                     | 18                      | 150                                      | 2.304                    | 0.075                  | 21.15                                                       | 596.1                                       | 4.88                                                       |
| 32                     | 22                      | 150                                      | 1.820                    | 0.054                  | 17.93                                                       | 587.9                                       | 7.97                                                       |
| 35                     | 25                      | 150                                      | 1.219                    | 0.041                  | 9.59                                                        | 586.2                                       | 6.55                                                       |
| 39                     | 29                      | 150                                      | 0.669                    | 0.034                  | 2.93                                                        | 584.4                                       | 3.55                                                       |
| 44                     | 34                      | 150                                      | 0.799                    | 0.027                  | 3.40                                                        | 581.8                                       | 4.56                                                       |
| 46                     | 36                      | 150                                      | 0.762                    | 0.025                  | 1.88                                                        | 581.3                                       | 2.67                                                       |
| 23                     | 18                      | 150                                      | 5.261                    | 0.071                  | 21.15                                                       | 303.047                                     | 2.29                                                       |
| 33                     | 18                      | 150                                      | 1.735                    | 0.076                  | 21.15                                                       | 883.8                                       | 6.83                                                       |
| 38                     | 18                      | 150                                      | 1.451                    | 0.077                  | 21.15                                                       | 1172.0                                      | 7.99                                                       |
| 30                     | 25                      | 150                                      | 1.368                    | 0.041                  | 9.59                                                        | 293.9                                       | 4.38                                                       |
| 40                     | 25                      | 150                                      | 1.081                    | 0.041                  | 9.59                                                        | 875.6                                       | 7.65                                                       |
| 45                     | 25                      | 150                                      | 0.956                    | 0.041                  | 9.59                                                        | 1162.9                                      | 9.85                                                       |
| 35                     | 25                      | 50                                       | 0.406                    | 0.041                  | 9.59                                                        | 586.2                                       | 16.46                                                      |
| 35                     | 25                      | 100                                      | 0.812                    | 0.041                  | 9.59                                                        | 586.2                                       | 9.78                                                       |
| 28                     | 18                      | 50                                       | 0.787                    | 0.081                  | 21.15                                                       | 596.1                                       | 11.13                                                      |
| 28                     | 18                      | 100                                      | 1.550                    | 0.077                  | 21.15                                                       | 596.1                                       | 6.70                                                       |
